# Supplementary material
Source: PubMed Central journal article supplement (PMC7078034)
Supplement: NIHMS1056125-supplement-suppl.pdf [file NIHMS1056125-supplement-suppl.pdf]

## **Scytodecamide from the Cultured *Scytonema* sp. UIC 10036 Expands the Chemical and Genetic Diversity of Cyanobactins**

Camila M. Crnkovic,<sup>[a,b]</sup> Jana Braesel,<sup>[a]</sup> Aleksej Kronic,<sup>[a]</sup> Alessandra S. Eustáquio,<sup>[a]</sup> Jimmy Orjala\*<sup>[a]</sup>

<sup>[a]</sup> Department of Medicinal Chemistry and Pharmacognosy, College of Pharmacy, University of Illinois at Chicago, Chicago, Illinois 60612 (USA)

<sup>[b]</sup> CAPES Foundation, Ministry of Education of Brazil, Brasília, Federal District 70040-020 (Brazil)

# **Supporting Information**

Table of contents:

- S1.** Photomicrograph (40x, bright field) of *Scytonema* sp. UIC 10036
- S2.** Phylogenetic analysis of *Scytonema* sp. UIC 10036
- S3.** MS/MS spectrum of **1**
- S4.** <sup>1</sup>H NMR spectrum (900 MHz, methanol-d<sub>4</sub>) of **1**
- S5.** <sup>1</sup>H NMR spectrum (900 MHz, methanol-d<sub>3</sub>) of **1**
- S6.** DEPTQ spectrum (226 MHz, methanol-d<sub>4</sub>) of **1**
- S7.** COSY spectrum (900 MHz, methanol-d<sub>4</sub>) of **1**
- S8.** COSY spectrum (900 MHz, methanol-d<sub>3</sub>) of **1**
- S9.** TOCSY spectrum (900 MHz, methanol-d<sub>4</sub>) of **1**
- S10.** Edited HSQC spectrum (900 MHz, methanol-d<sub>4</sub>) of **1**
- S11.** HMBC spectrum (900 MHz, methanol-d<sub>4</sub>) of **1**
- S12.** HMBC spectrum (900 MHz, methanol-d<sub>3</sub>) of **1**
- S13.** <sup>1</sup>H NMR spectrum (900 MHz, pyridine-d<sub>5</sub> with TFA vapour) of **1**
- S14.** DEPTQ spectrum (226 MHz, pyridine-d<sub>5</sub> with TFA vapour) of **1**
- S15.** COSY spectrum (900 MHz, pyridine-d<sub>5</sub> with TFA vapour) of **1**
- S16.** TOCSY spectrum (900 MHz, pyridine-d<sub>5</sub> with TFA vapour) of **1**
- S17.** Edited HSQC spectrum (900 MHz, pyridine-d<sub>5</sub> with TFA vapour) of **1**
- S18.** HMBC spectrum (900 MHz, pyridine-d<sub>5</sub> with TFA vapour) of **1**
- S19.** Band-selective HMBC spectrum (900 MHz, pyridine-d<sub>5</sub> with TFA vapour) of **1**
- S20.** Marfey's analysis of **1**
- S21.** Protein BLAST statistics for putative *scd* biosynthetic gene cluster
- S22.** Sequence comparison of known cyanobactin precursor peptides and ScdE
- S23.** Comparison of ScdMT from *Scytonema* sp. UC 10036 and PatA from *Prochloron didemni*
- S24.** Percent identity (similarity) shared between the DUF domains of ScdA and ScdMT with PatA and three PatA homologues.
- S25.** Percent identity (similarity) shared between the DUF domains of ScdA and ScdMT with PatG and three PatG homologues.

S1. Photomicrograph (40x, bright field) of *Scytonema* sp. UIC 10036

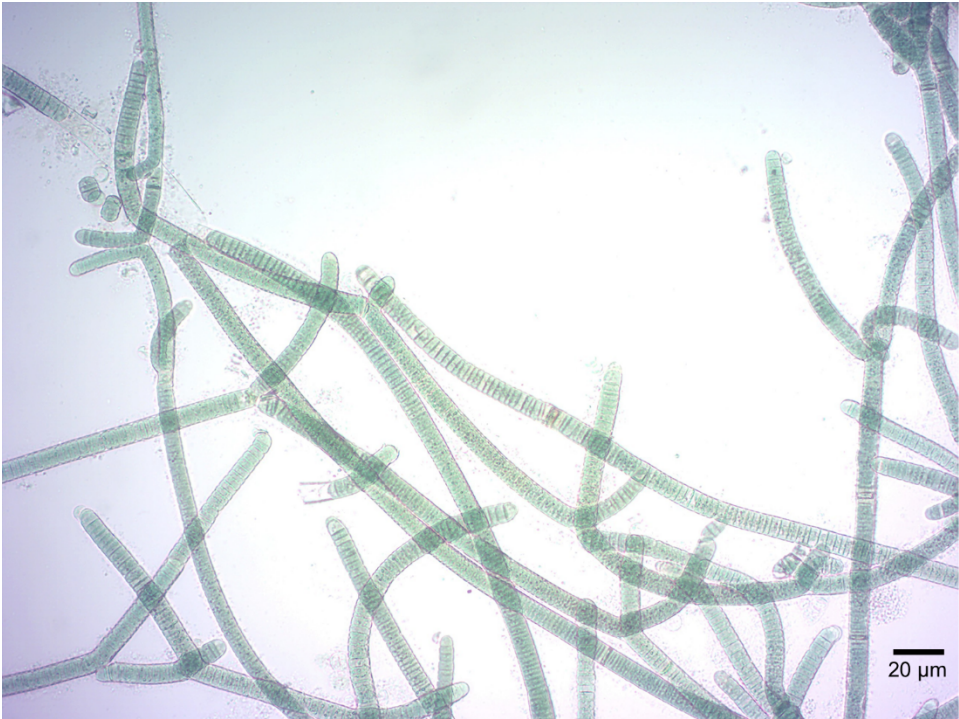

S2. Phylogenetic analysis of *Scytonema* sp. 10036

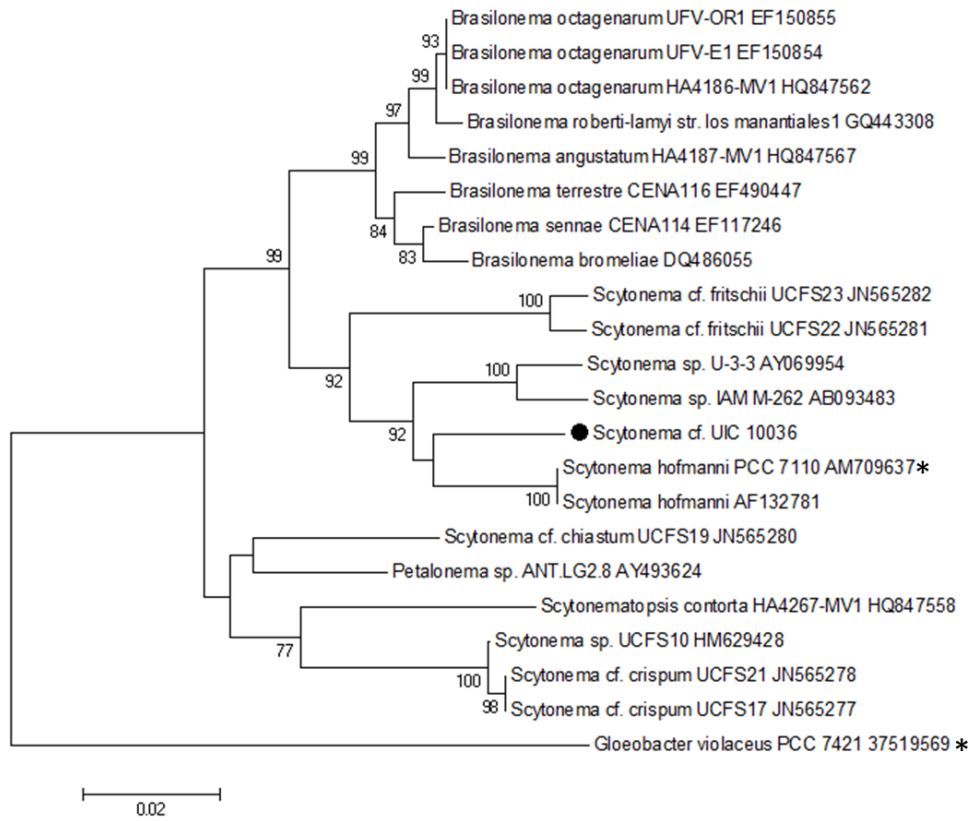

\* Reference strains are indicated by an asterisk

### S3. MS/MS spectrum of 1

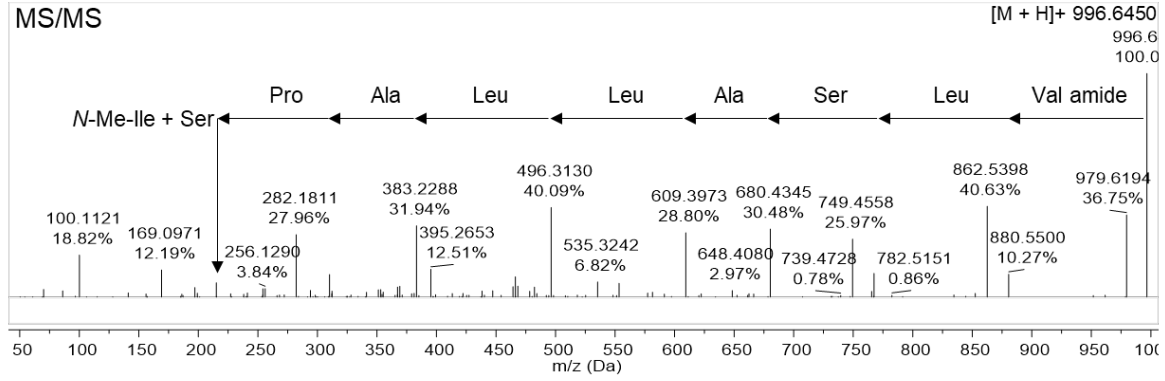

S4.  $^1\text{H}$  NMR spectrum (900 MHz, methanol- $d_4$ ) of 1. X: impurities

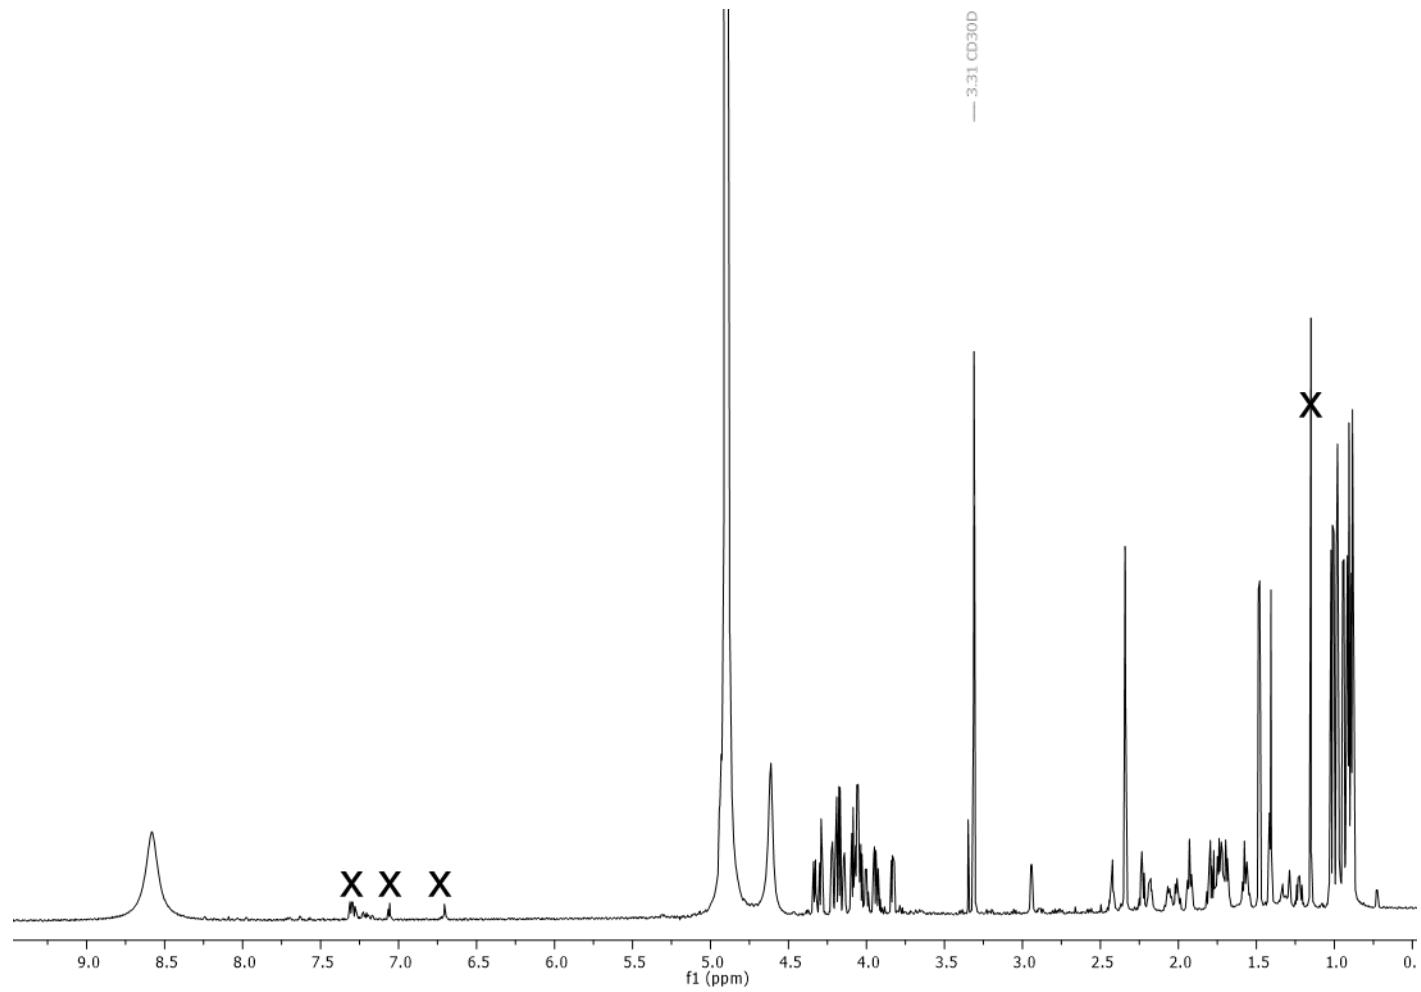

S5.  $^1\text{H}$  NMR spectrum (900 MHz, methanol- $\text{d}_3$ ) of 1. X: impurities

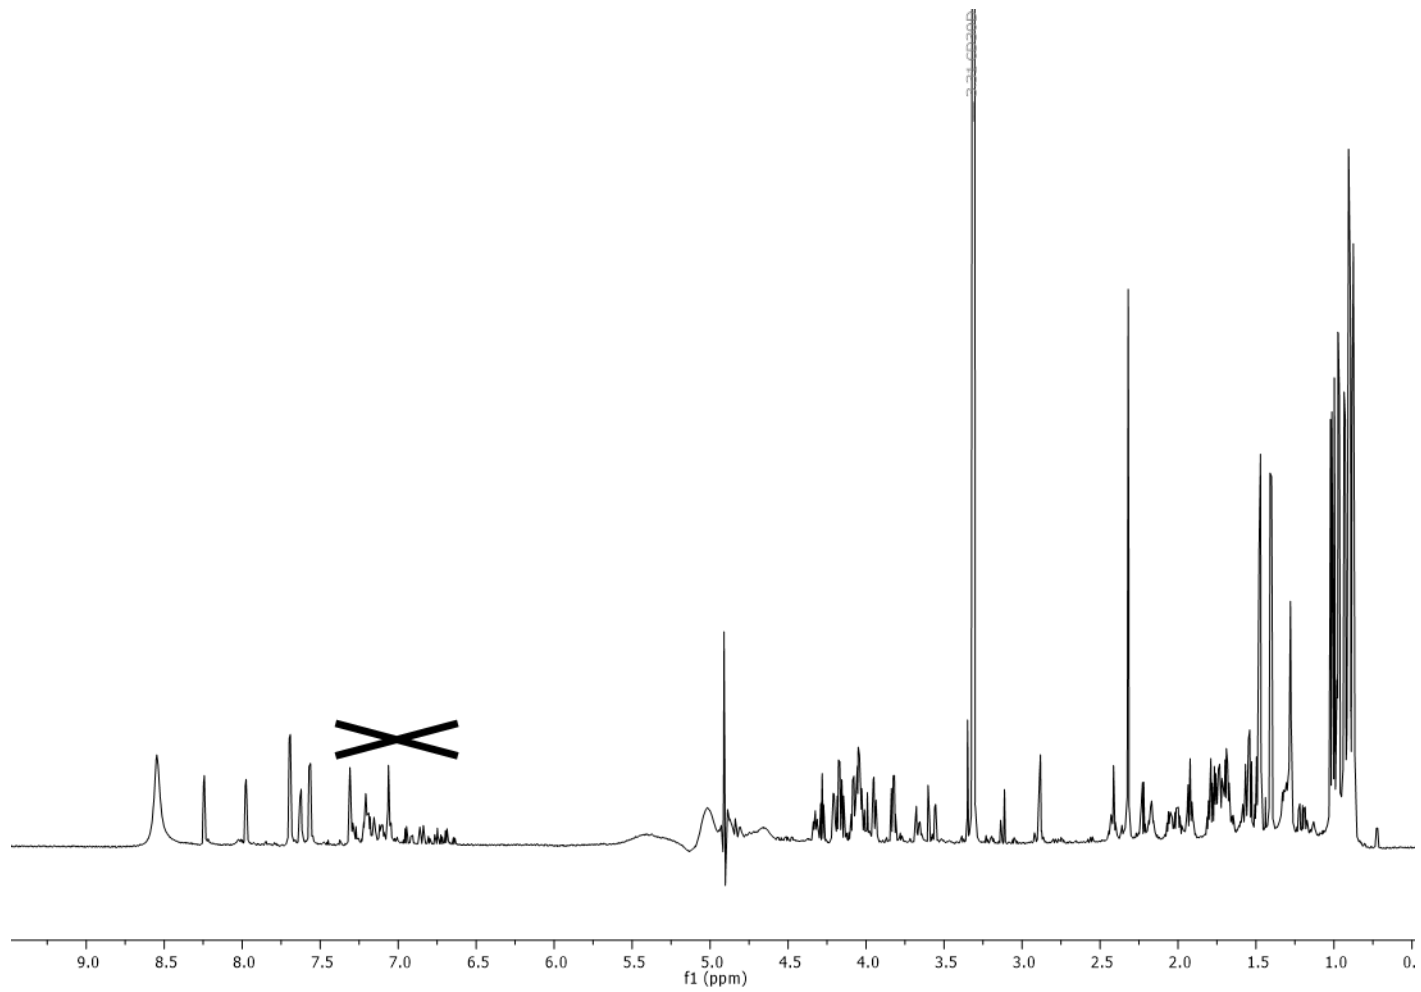

S6. DEPTQ spectrum (226 MHz, methanol-d<sub>4</sub>) of **1**

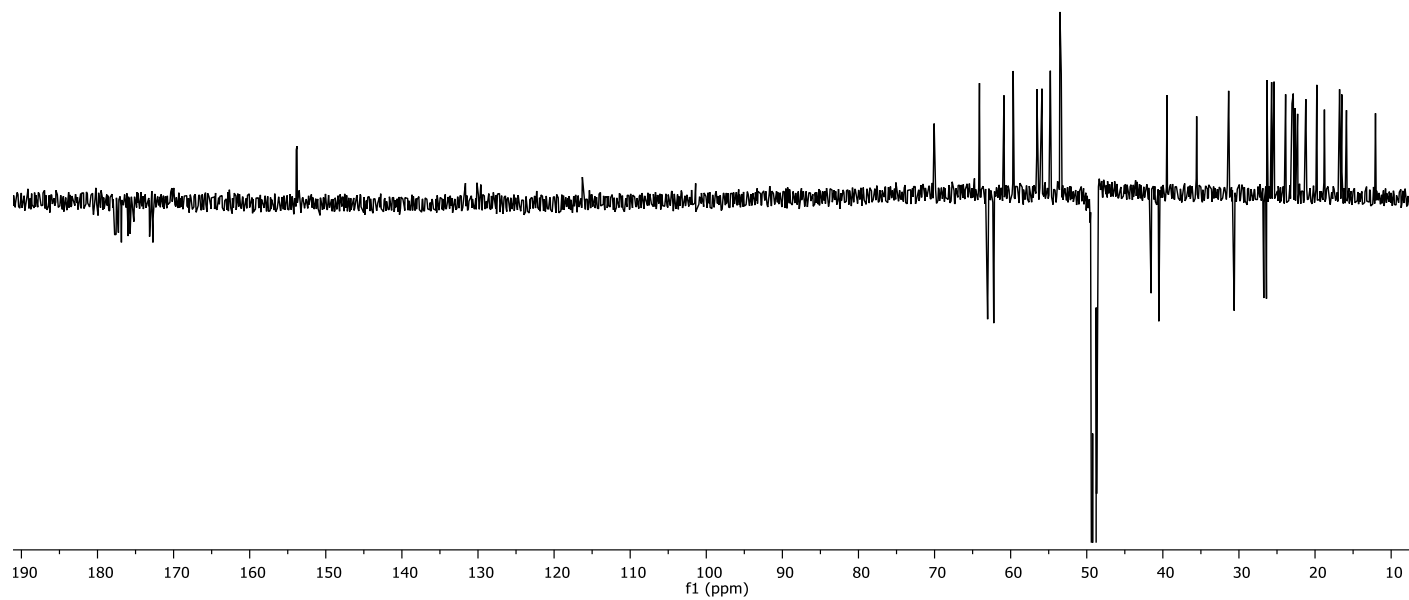



S7. COSY spectrum (900 MHz, methanol-d<sub>4</sub>) of 1. X: impurities

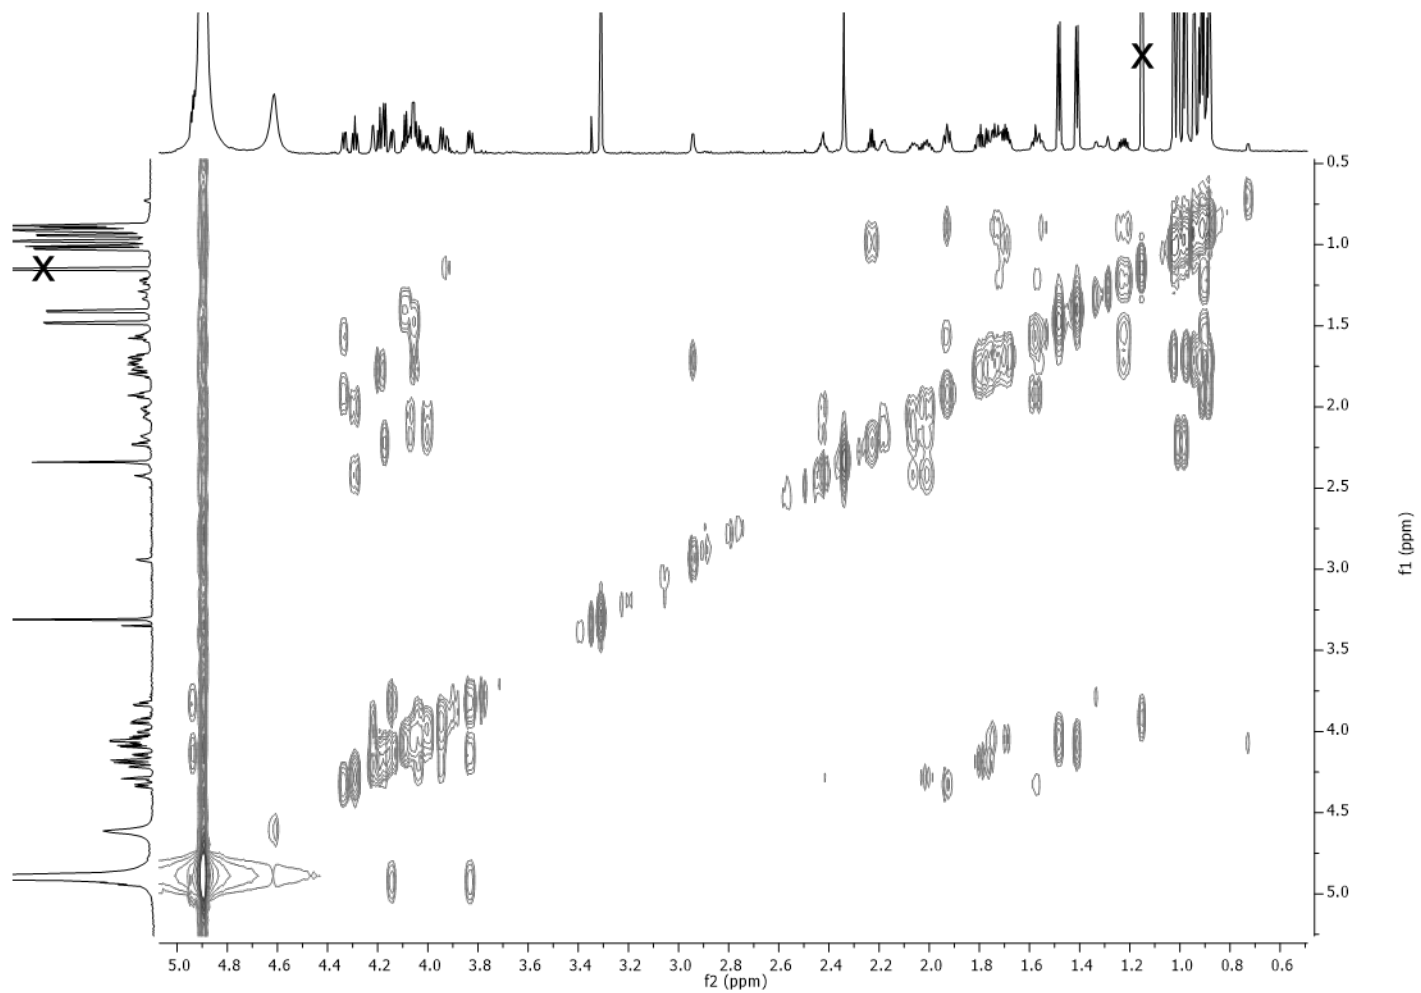

**S8.** COSY spectrum (900 MHz, methanol-d<sub>3</sub>) of **1**

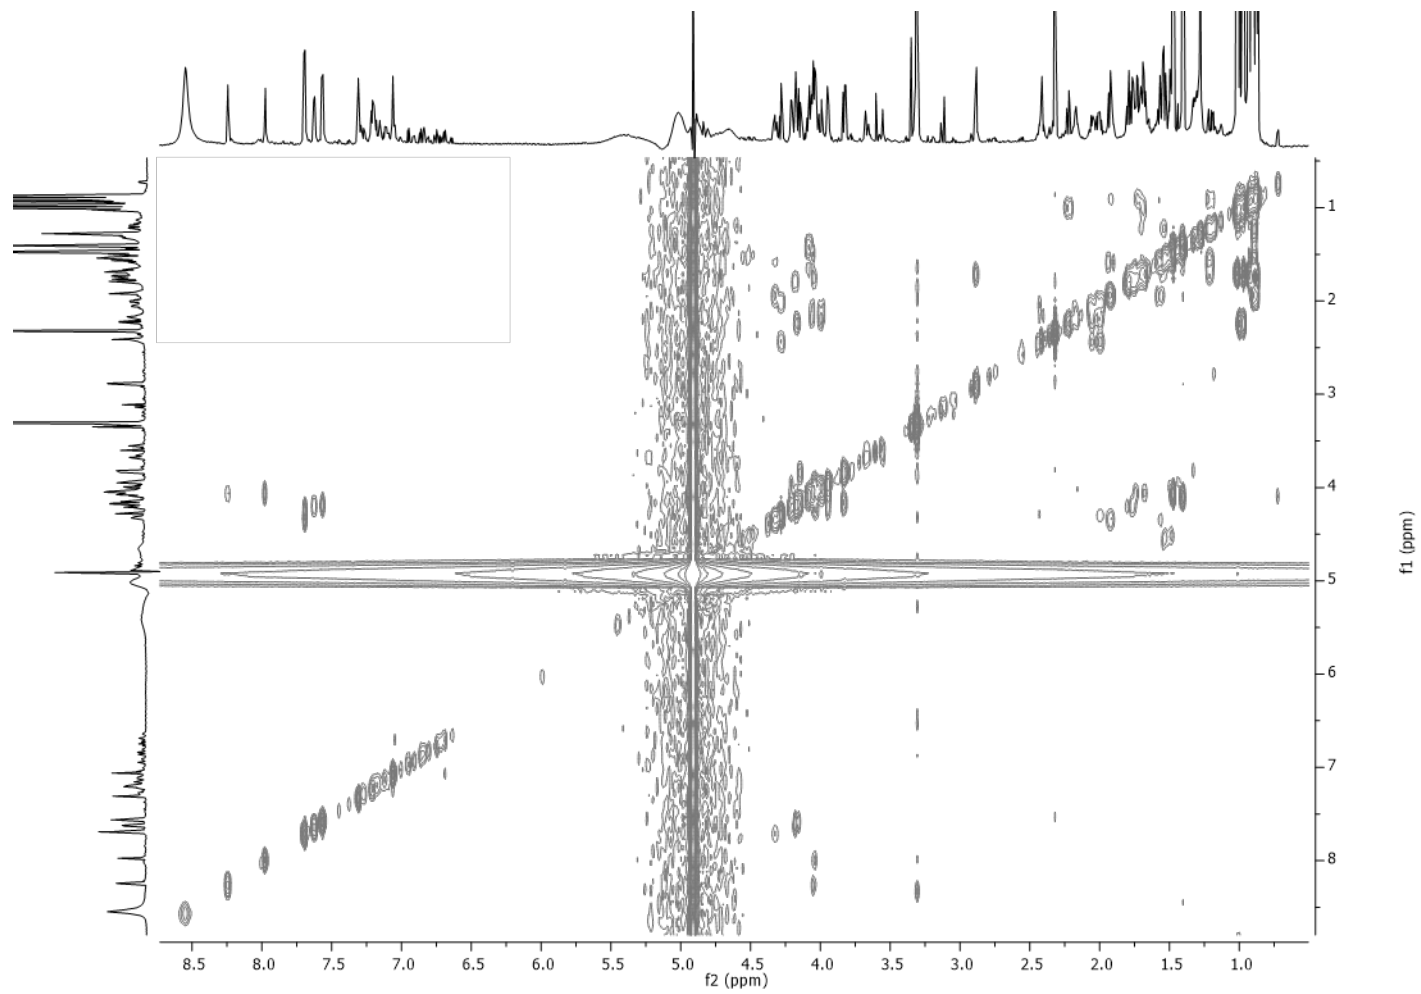

S9. TOCSY spectrum (900 MHz, methanol-d<sub>4</sub>) of 1. X: impurities

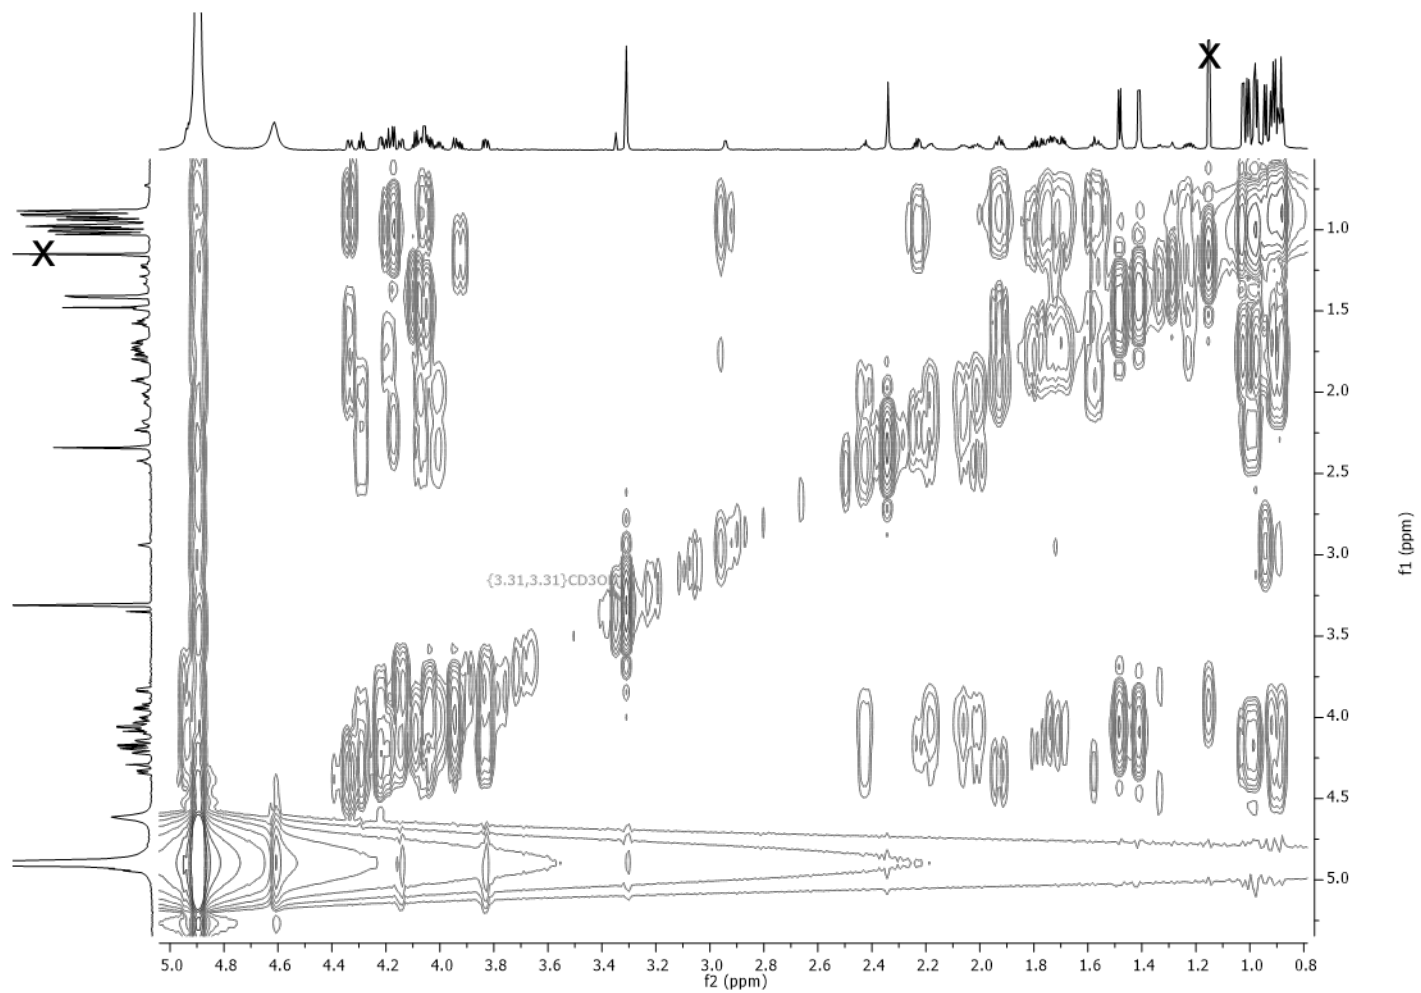

**S10.** Edited HSQC spectrum (900 MHz, methanol-d<sub>4</sub>) of **1**. X: impurities

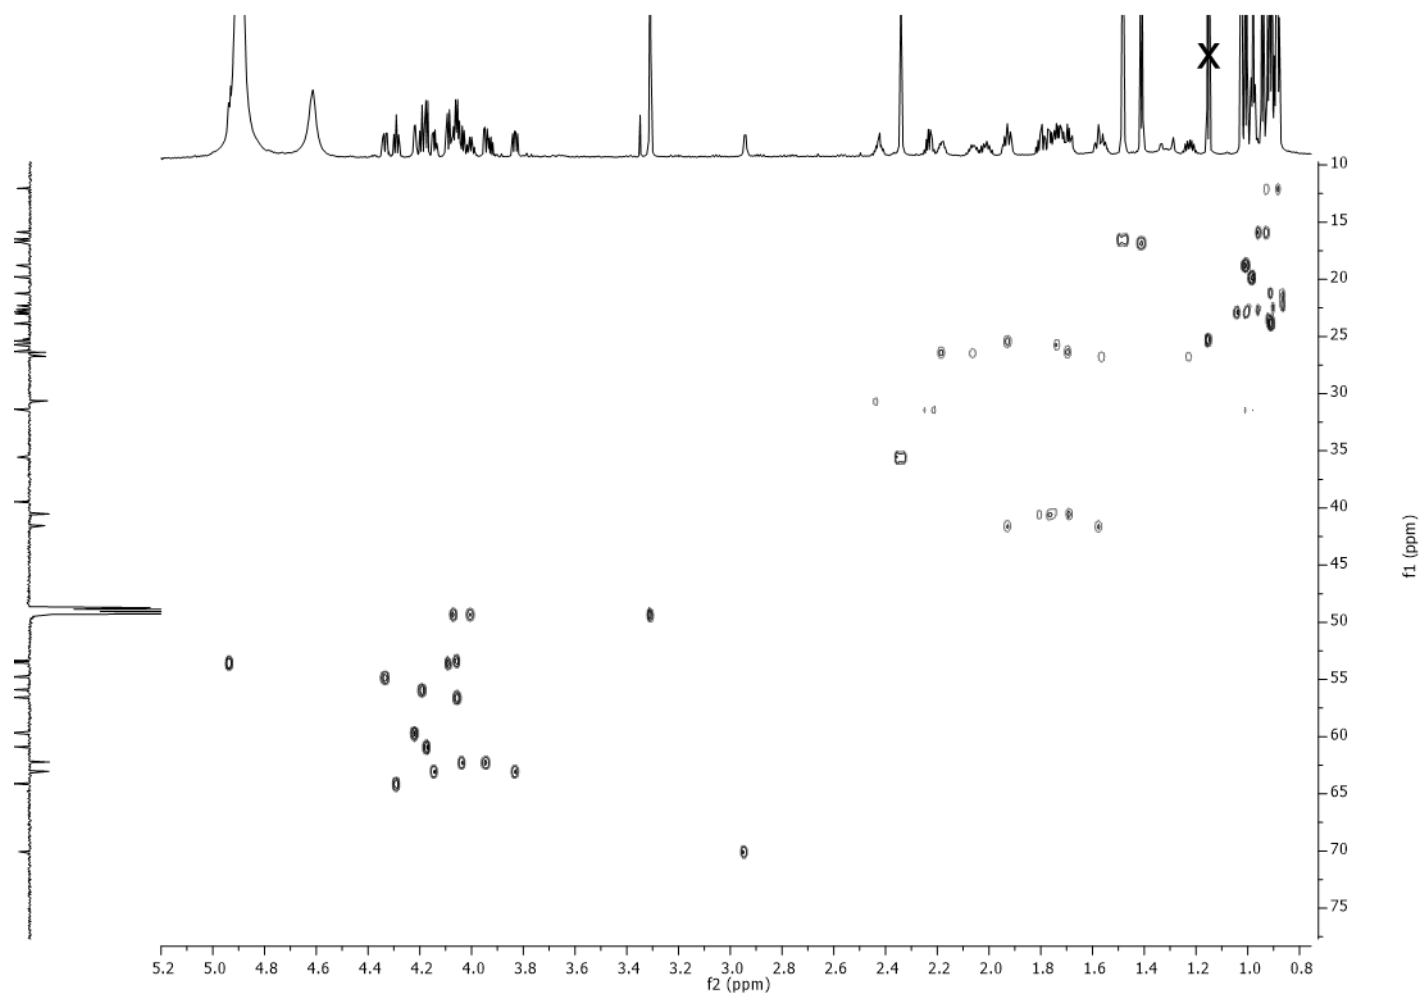

S11. HMBC spectrum (900 MHz, methanol-d<sub>4</sub>) of 1. X: impurities

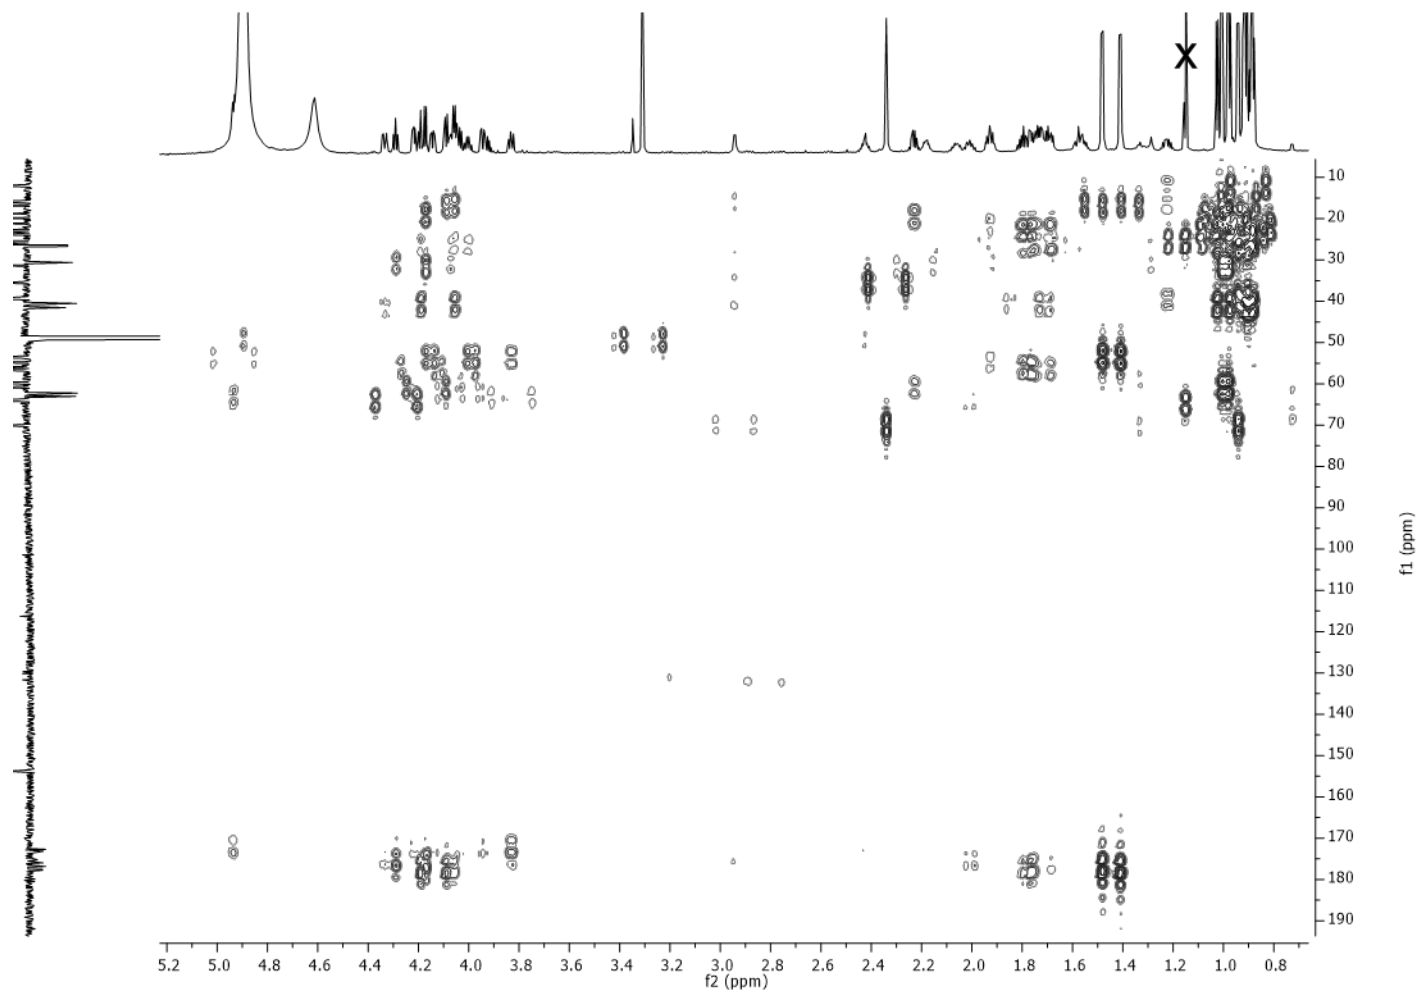

S12. HMBC spectrum (900 MHz, methanol-d<sub>3</sub>) of **1**

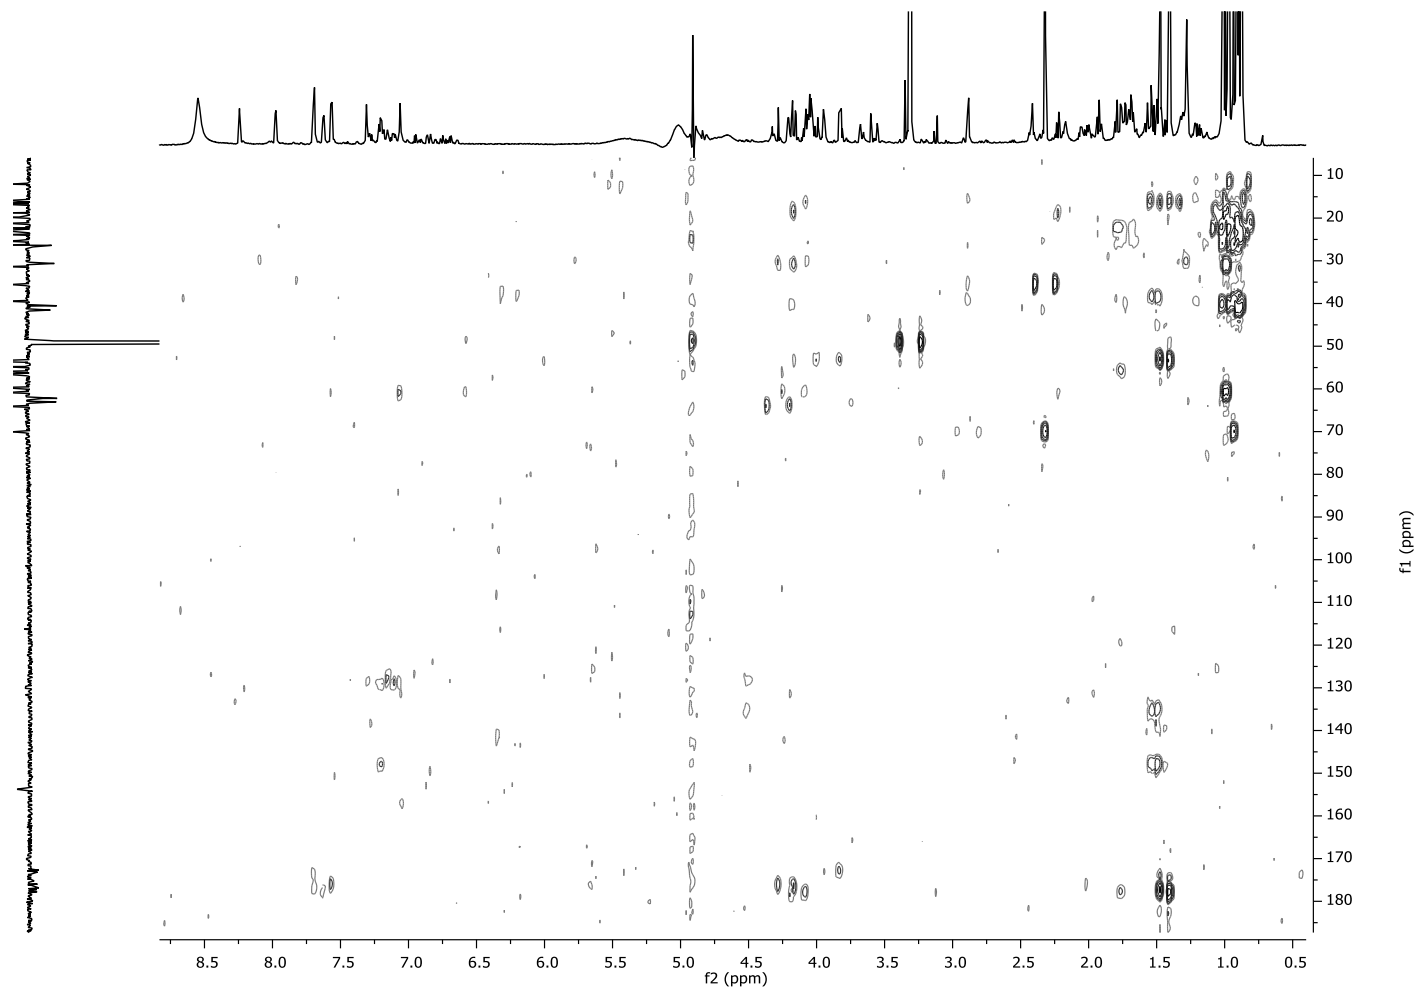

**S13.**  $^1\text{H}$  NMR spectrum (900 MHz, pyridine- $d_5$  with TFA vapour) of **1**. X: impurities

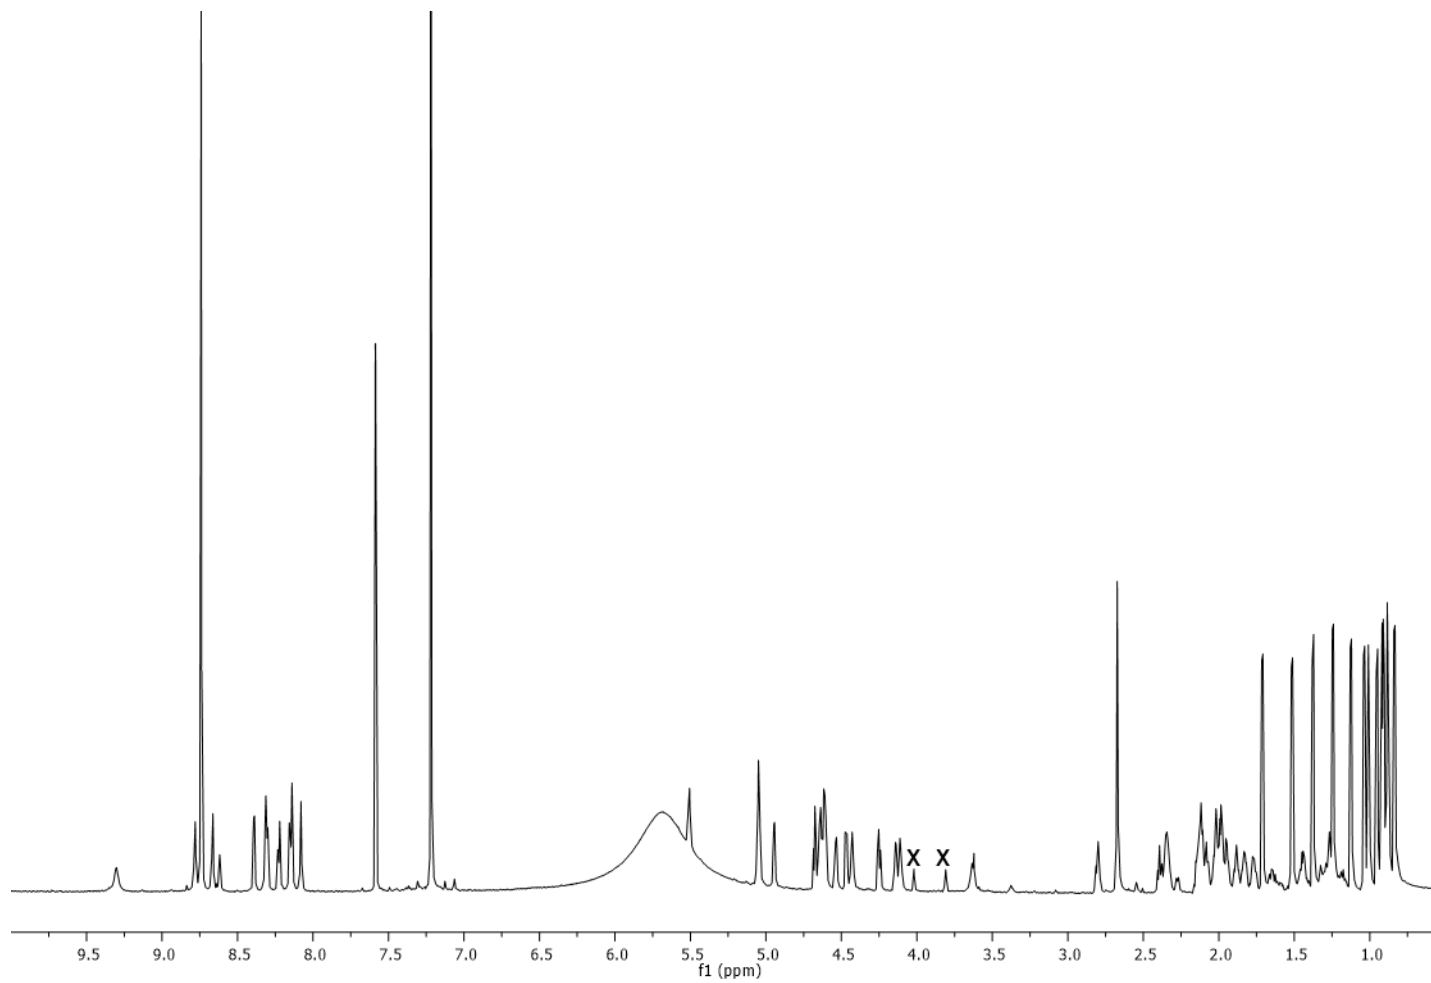

**S14.** DEPTQ spectrum (226 MHz, pyridine-d<sub>5</sub> with TFA vapour) of **1**

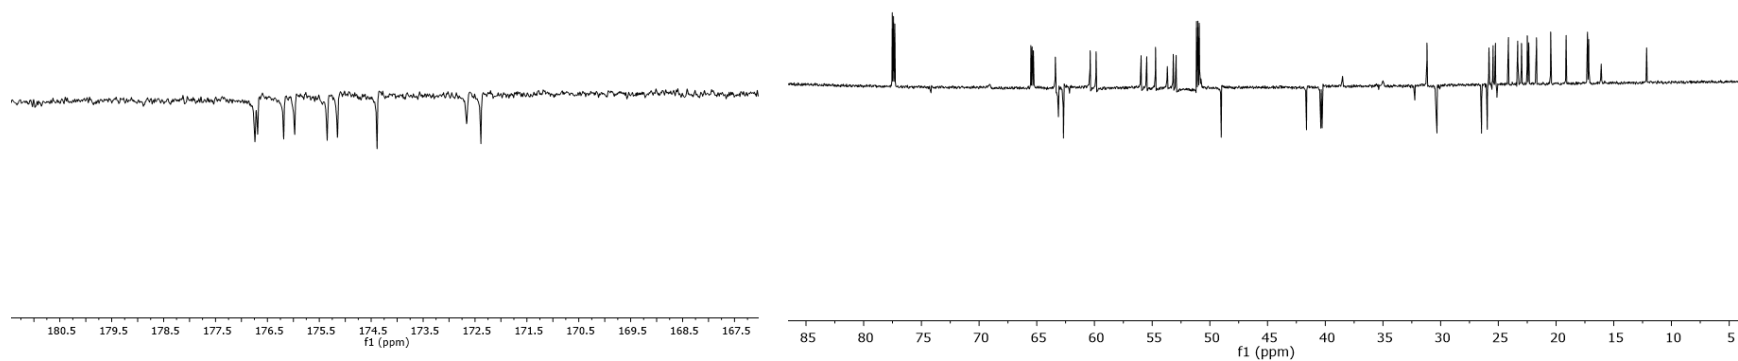



S15. COSY spectrum (900 MHz, pyridine-d<sub>5</sub> with TFA vapour) of **1**

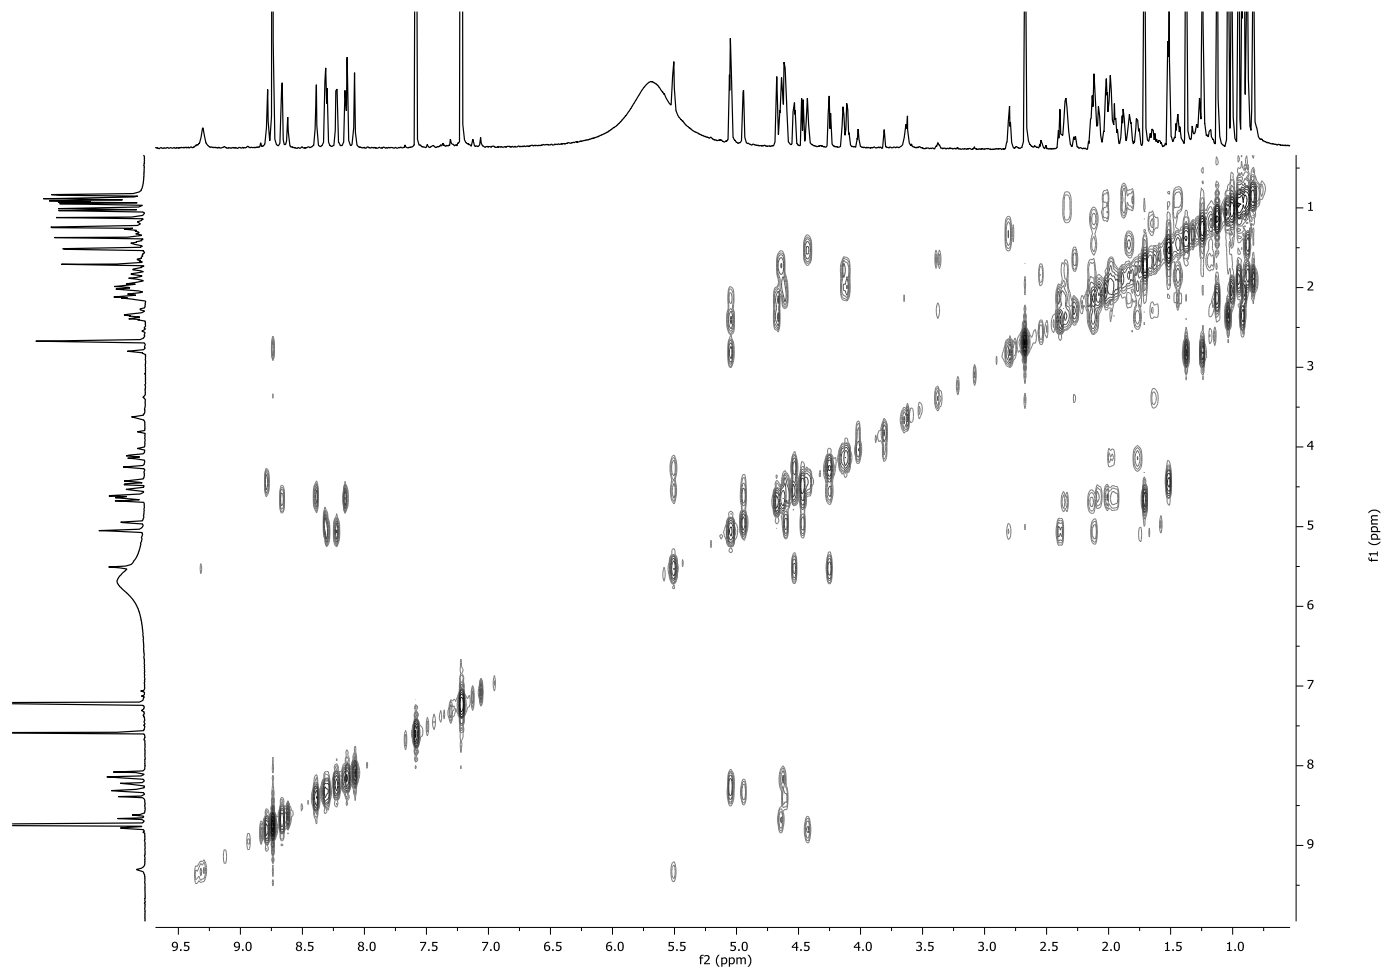

**S16.** TOCSY spectrum (900 MHz, pyridine-d<sub>5</sub> with TFA vapour) of **1**

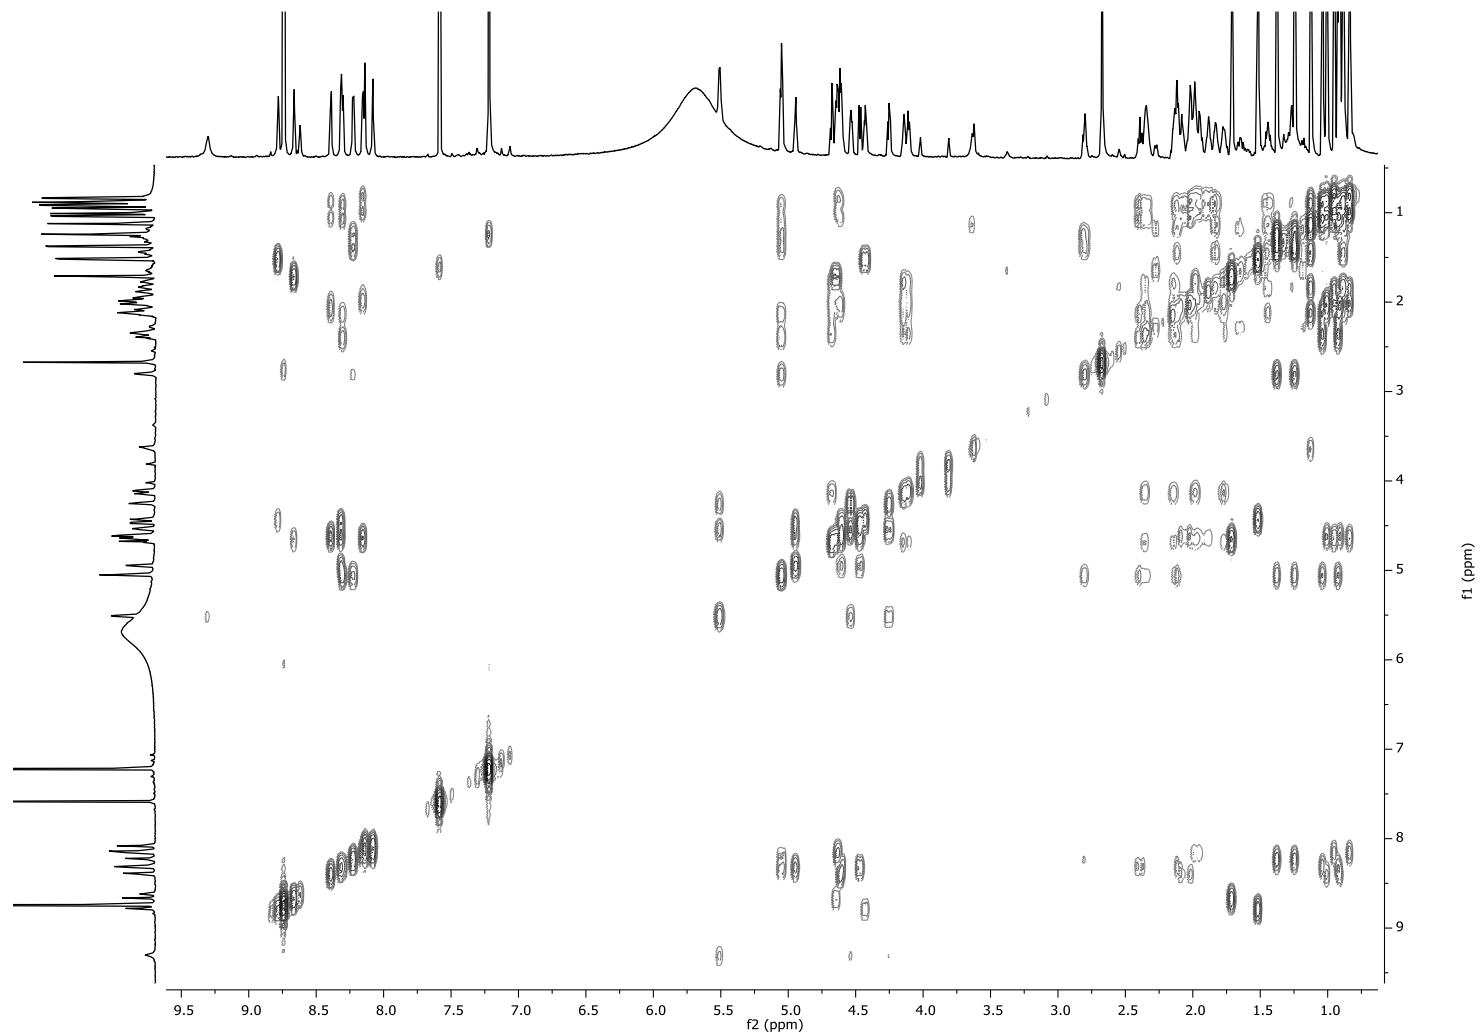

S17. Edited HSQC spectrum (900 MHz, pyridine-d<sub>5</sub> with TFA vapour) of **1**

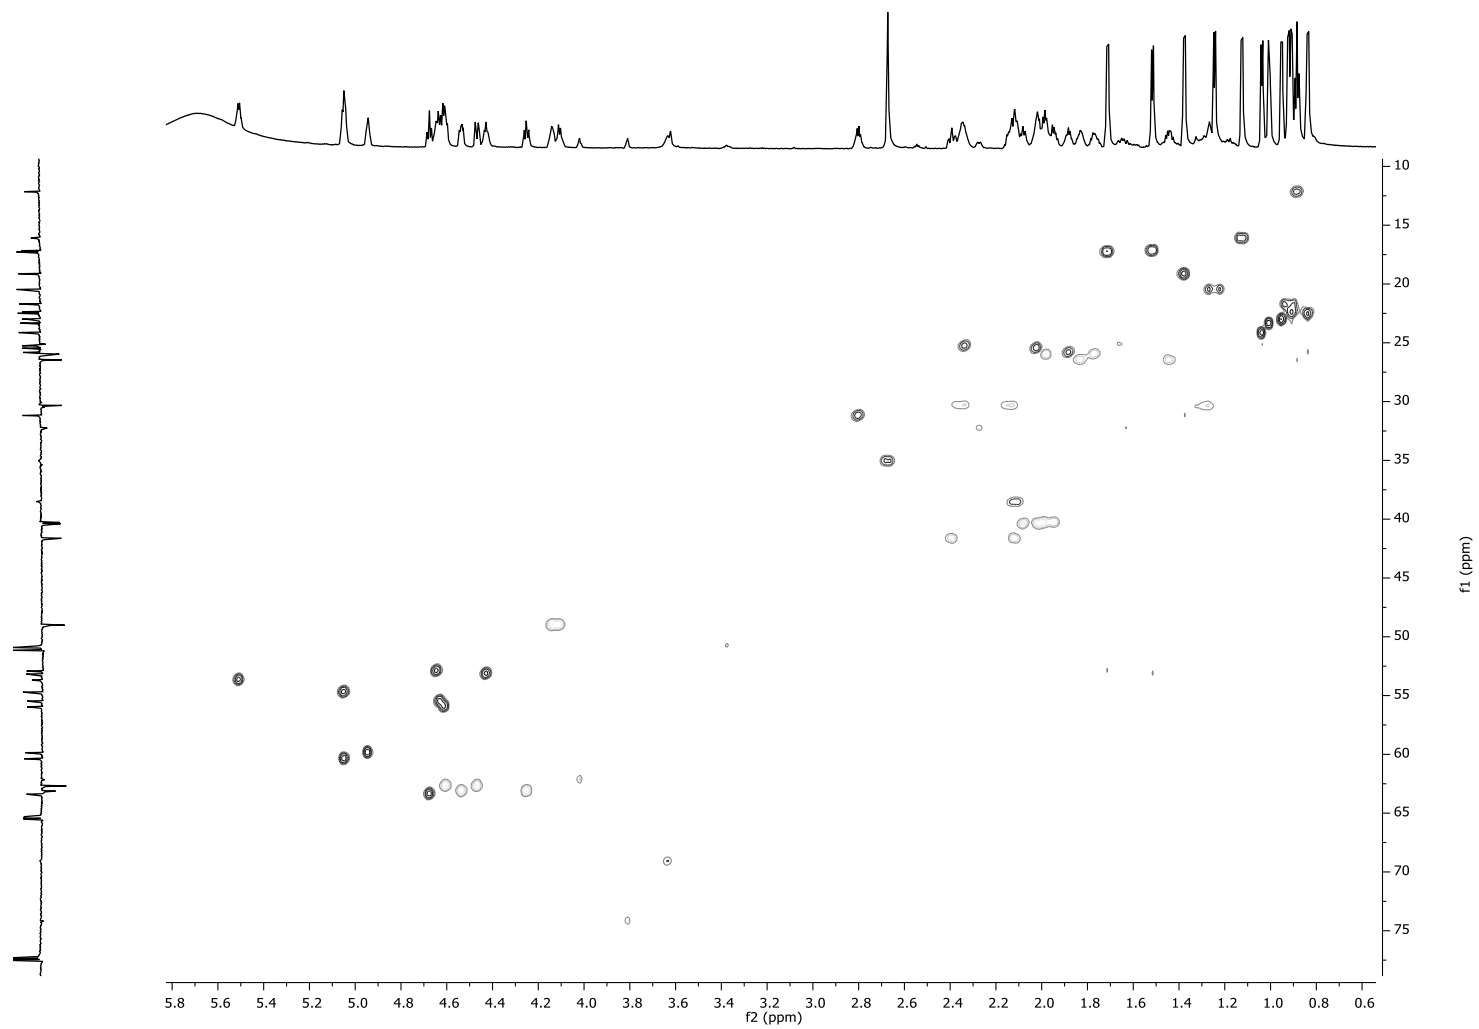

S18. HMBC spectrum (900 MHz, pyridine-d<sub>5</sub> with TFA vapour) of **1**

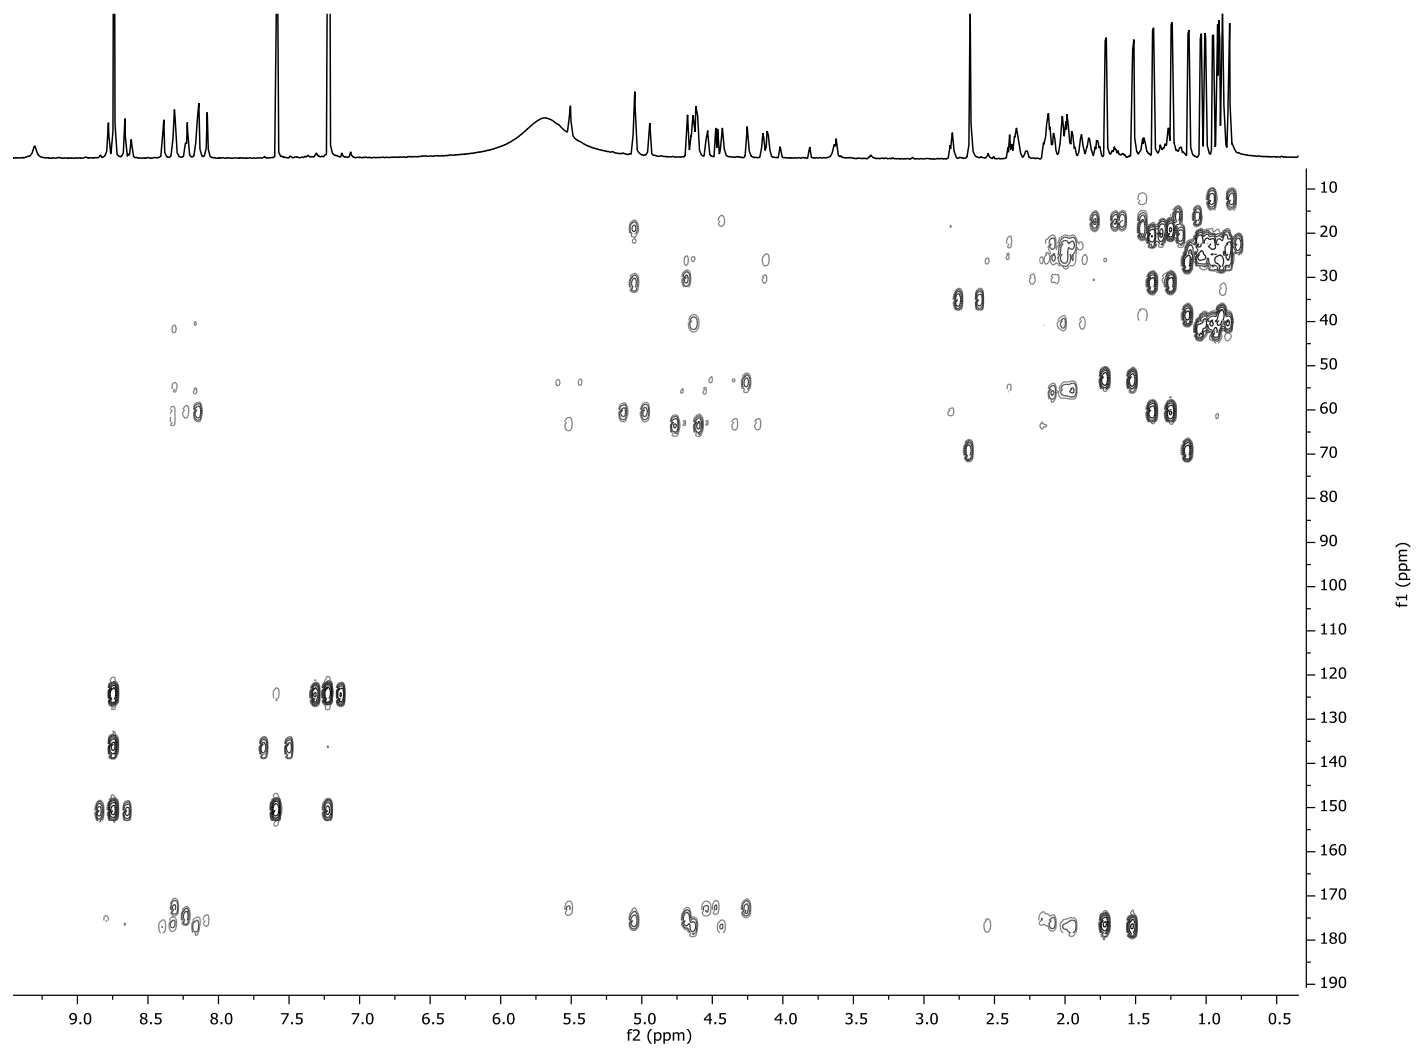

**S19.** Band-selective HMBC spectrum (900 MHz, pyridine-d<sub>5</sub> with TFA vapour) of **1**

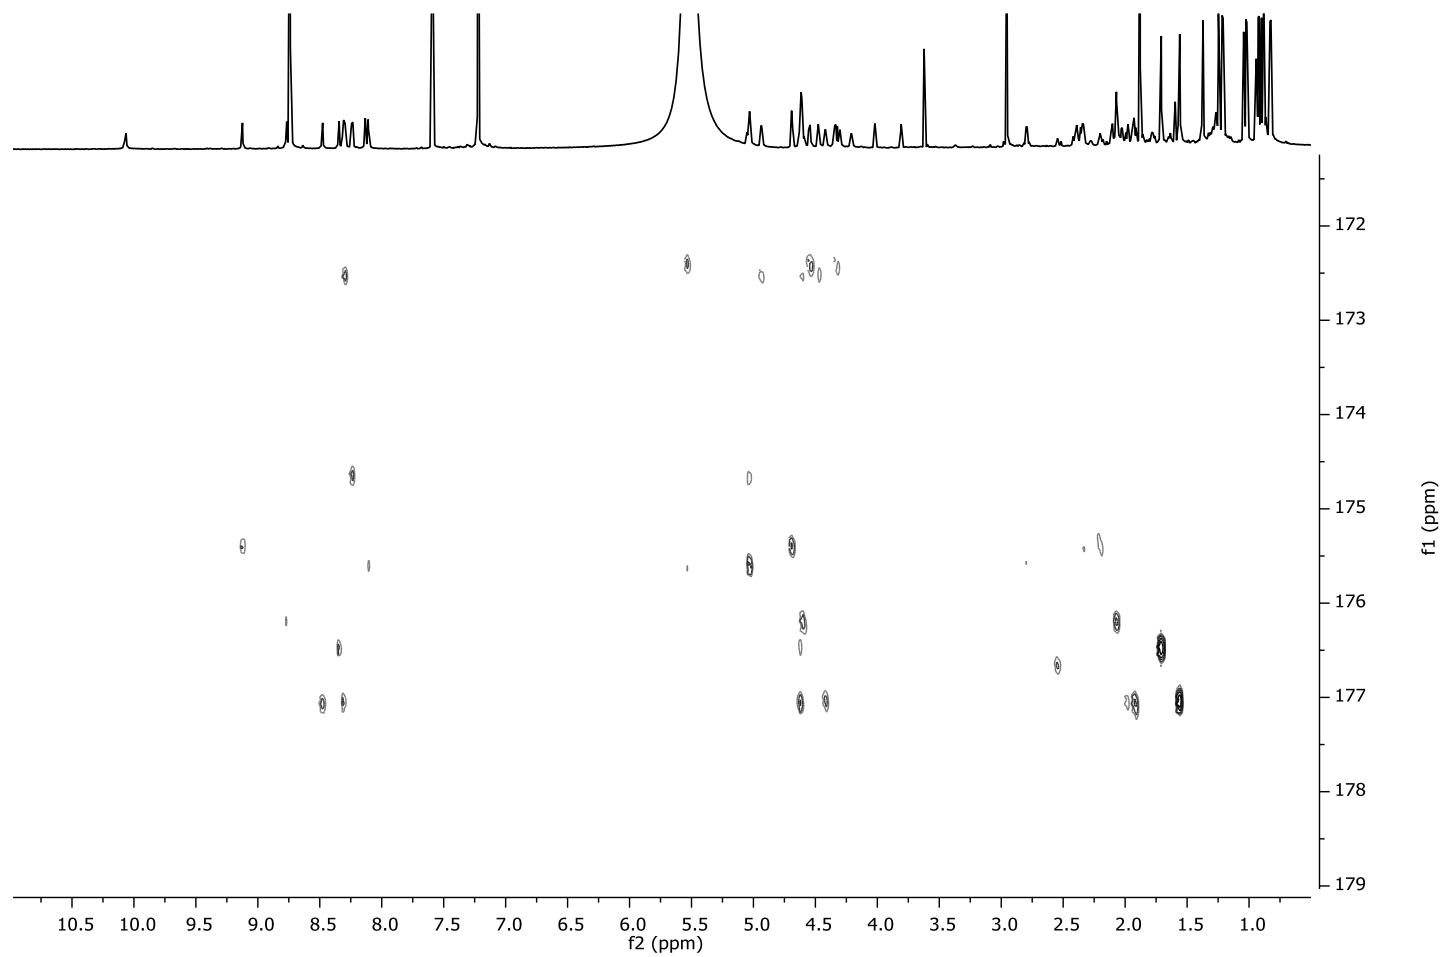

## S20. Marfey's analysis of **1**

| Amino acid ( <i>m/z</i> )     | Retention time (min) |      |          | Assignment |
|-------------------------------|----------------------|------|----------|------------|
|                               | L                    | D    | Measured |            |
| Val (412.18)                  | 4.35                 | 5.76 | 4.35     | L          |
| Ser (400.14)                  | 2.70                 | 2.89 | 2.67     | L*         |
| Leu (426.19)                  | 5.03                 | 6.57 | 5.03     | L          |
| Ala (384.14)                  | 3.55                 | 4.36 | 3.52     | L          |
| Pro (410.16)                  | 3.56                 | 4.16 | 3.54     | L          |
| <i>N</i> -Me-Ile (440.2)      | 5.58                 | 6.47 | 5.61     | L*         |
| <i>allo-N</i> -Me-Ile (440.2) | 5.64                 | 6.52 | --       |            |

\*Verified by co-injection (see below)

### a) Extracted ion chromatograms (EIC) of the hydrolysate of **1** derivatized with L-FDLA

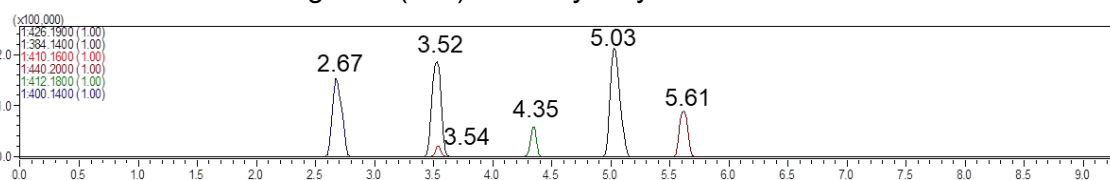

### b) Co-injection of the Marfey's derivatives of the hydrolysate of **1** and L-Ser standard (EIC)

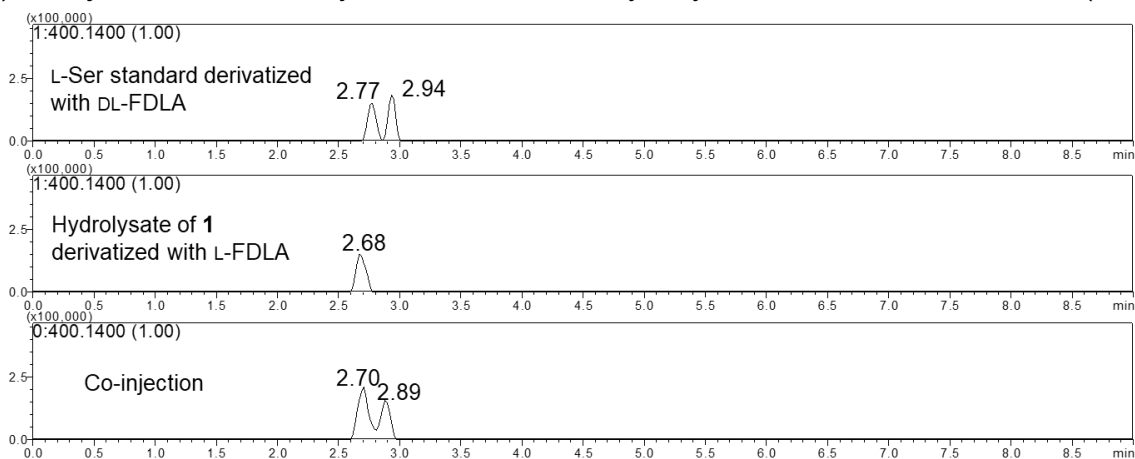

b) Co-injections of the Marfey's derivatives of the hydrolysate of **1** and D-N-Me-Ile or D-*allo*-N-Me-Ile standards (EIC)

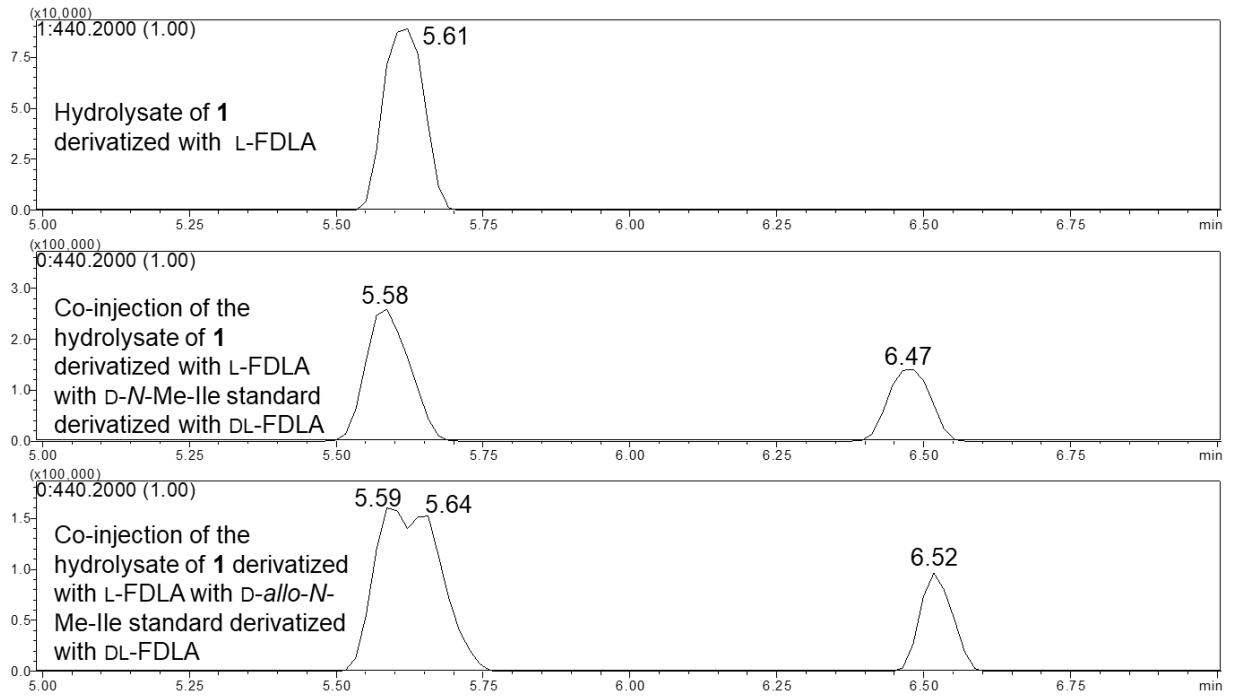

**S21. BLASTP\*** results for putative *scd* biosynthetic gene cluster

| <b>Protein</b> | <b>Length (aa)</b> | <b>Description</b>                                                                                                                                    | <b>Organism</b>                          | <b>Accession number</b> | <b>Identity/coverage (%)</b> |
|----------------|--------------------|-------------------------------------------------------------------------------------------------------------------------------------------------------|------------------------------------------|-------------------------|------------------------------|
| ORF-2          | 188                | hypothetical protein                                                                                                                                  | <i>Scytonema hofmannii</i>               | WP_017742275.1          | 84/100                       |
| ORF-1          | 119                | hypothetical protein                                                                                                                                  | <i>Pseudomonas</i> sp. 286               | WP_122523577.1          | 27/71                        |
| ScdC           | 56                 | cyanobactin biosynthesis PatC/TenC/TruC family protein                                                                                                | <i>Nostoc linckia</i>                    | WP_099072933.1          | 82/87                        |
| ScdB           | 65                 | cyanobactin biosynthesis system PatB/AcyB/McaB family protein                                                                                         | <i>Nostoc linckia</i>                    | WP_099068421.1          | 91/100                       |
| ScdMT          | 587                | PatA/PatG family cyanobactin maturation protease (Blast identifies two methyltransferase domains at the N-terminus of this <i>Cyanothece</i> protein) | <i>Cyanothece</i> sp. PCC 7822           | WP_013335048.1          | 79/100                       |
| ScdA           | 697                | PatA/PatG family cyanobactin maturation protease                                                                                                      | <i>Nostoc linckia</i>                    | WP_099068419.1          | 77/100                       |
| ScdE           | 70                 | hypothetical protein                                                                                                                                  | <i>Cyanothece</i> sp. PCC 7822           | WP_013335046.1          | 63/95                        |
| ScdTA          | 627                | asparagine synthase (glutamine-hydrolyzing)                                                                                                           | <i>Nostocales cyanobacterium</i> HT-58-2 | WP_087538154.1          | 89/99                        |
| ORF+1          | 82                 | hypothetical protein                                                                                                                                  | <i>Scytonema hofmannii</i>               | WP_017742276.1          | 99/100                       |
| ORF+2          | 415                | CCA tRNA nucleotidyltransferase                                                                                                                       | <i>Tolypothrix bouteillei</i>            | WP_038080351.1          | 90/99                        |

\*protein-protein blast against refseq protein database, accessed April 2019



**Table S22. Sequence comparison of known cyanobactin precursor peptides and ScdE.**

| Protein | Organism                                                  | Accession number | Leader sequence             | RSI       | Spacer       | RSII                             | Core                                            | RSIII                                    | Compound        |
|---------|-----------------------------------------------------------|------------------|-----------------------------|-----------|--------------|----------------------------------|-------------------------------------------------|------------------------------------------|-----------------|
| ScdE    | <i>Scytonema</i> sp.<br>UIC10036                          | This study       | MRPENQKENRCLQPKLSEPMARSHAGM | PVDLSEEEL | TAEVVNG      | GVFAS<br>GVTAS                   | MYGGTDG <sup>1</sup><br>ISPALLASLV <sup>2</sup> | -----<br>-----                           | scytodecamide   |
| AgeE    | <i>Microcystis aeruginosa</i><br>PCC 9432                 | WP_043998581.1   | MDKKNILPHQGKPVLRRTNGKLPSH   | LAELSEEAL | GGA          | GMDAS<br>GADAS<br>GADAS          | FFPC<br>FFPVC<br>FFPC                           | SYD----<br>SYD----<br>SYDDGDA            | aeruginosamide  |
| LynE    | <i>Lynbya</i> sp.<br>PCC 8106                             | WP_071941443.1   | MDKKNILPHQGKPVLRRTNGKLPSH   | LAELSEEAL | GGN          | GVDAS<br>GVDAS<br>GVDAS          | ACMPCYP<br>VCMPCYP<br>VCMPCYP                   | SYD---<br>SYD---<br>SYDDAE               | aestuaramide    |
| McaE    | <i>Microcystis aeruginosa</i><br>PCC 9809                 | CCI23769.1       | MDKKNLLPNQGAPVIRGISGKLPSH   | LAELSEEAL | GGN          | GLEAS<br>GAEAS<br>GAEAS          | YTSSIC<br>VLATFC<br>VTVTIC                      | AFD----<br>AFD----<br>AFDGDEA            | microcyclamide  |
| PagE6   | <i>Planktothrix agardhii</i> NIES-596                     | AED99432.1       | MTKKNLKPQQAAPVQREINTTSSES   | -----     | GTST         | GLTPH                            | INPYLYP                                         | FAGDDAE                                  | prenylagaramide |
| PatE1   | <i>Prochloron didemni</i>                                 | AAY21154.1       | MNKKNILPQQQPVIRLITAGQLSSQ   | LAELSEEAL | GDA          | GLEAS<br>GVEPS                   | VTACITFC<br>ITVCISVC                            | --AYD--<br>--AYDGE                       | patellamide     |
| TenE    | <i>Nostoc spongiaeforme</i> var. <i>tenu</i> str. Carmeli | ACA04484.1       | MDKKNILPQQGKPVIRITGQLPSF    | LAELSEEAL | GDA          | GVGAS<br>GAGAS<br>GAGAS<br>GAGAS | ATGCMC<br>ATGCMC<br>ATACAC<br>ATACAC            | --AYD--<br>--AYD--<br>--AYD--<br>--AYE-- | tenucyclamide   |
| ThcE4   | <i>Cyanothece</i> sp. PCC 7425                            | WP_012626005.1   | MDLQNLPPQSQPIQRATAGQLPTE    | LAELTEEAL | NNES         | AVLAS                            | SCDCSLYGGCESC                                   | SYEGDEAE                                 | cyanothecamide  |
| TriG    | <i>Trichodesmium erythraeum</i>                           | WP_044136730.1   | MGKKNIQPNSSQPVFRSLVARPA     | LEELREENL | TEGNQGHGPLAN | GPGPS                            | GDGLHPRLCSCS                                    | -YDGDE                                   | trichamide      |

|       |                                                        |            |                           |           |     |                                  |                          |                                   |              |
|-------|--------------------------------------------------------|------------|---------------------------|-----------|-----|----------------------------------|--------------------------|-----------------------------------|--------------|
| TruE1 | uncultured<br><i>Prochloron</i> sp.<br>06037A          | ACA04491.1 | MNKKNILPQLGQPVIRLTAGQLSSQ | LAELSEEAL | G   | GVDAS<br>GVDAS                   | TLPVPTLC<br>TVPTLC       | SYD----<br>SYDD---                | trunkamide   |
| VirE  | <i>Oscillatoria</i><br><i>nigroviridis</i><br>PCC 7112 | AFZ08006.1 | MNKKNILPNPGKPVIRGISGKLPSY | LAELSEEAL | GDA | GADAS<br>SVDAS<br>SVDAS<br>SVDAS | FIC<br>FIC<br>FIC<br>FIC | -----<br>-----<br>-----<br>SVDGDA | viridisamide |

<sup>1</sup>This putative core peptide was not identified.

<sup>2</sup>Scytodecamide.

**S23.** Comparison of ScdMT from *Scytonema* sp. UC 10036 and PatA from *Prochloron didemni* (accession number AAY21150.1). Predicted domains are shown below the genes. The dotted line indicates the approx. 120 aa linker between the protease and DUF domains. Catalytic triad of the S8A protease is highlighted in yellow. The homolog region is connected by a grey area.

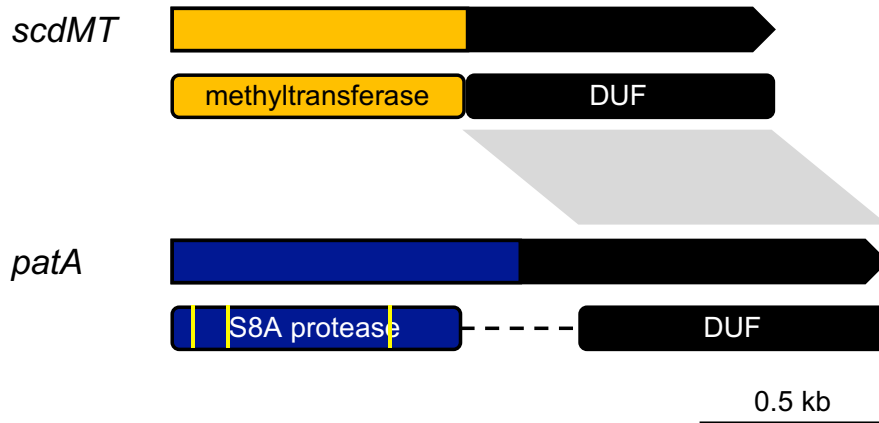

**S24.** Percent identity (similarity) shared between the DUF domains of ScdA and ScdMT with PatA and three PatA homologues.

|                  | <b>AgeA-DUF</b> | <b>PatA-DUF</b> | <b>TruA-DUF</b> | <b>VirA-DUF</b> |
|------------------|-----------------|-----------------|-----------------|-----------------|
| <b>ScdA-DUF</b>  | 72% (92%)       | 72% (92%)       | 72% (92%)       | 72% (91%)       |
| <b>ScdMT-DUF</b> | 65% (89%)       | 65% (89%)       | 65% (89%)       | 66% (88%)       |

**S25.** Percent identity (similarity) shared between the DUF domains of ScdA and ScdMT with PatG and three PatG homologues.

|                  | <b>AgeG-DUF</b> | <b>PatG-DUF</b> | <b>TruG-DUF</b> | <b>VirG-DUF</b> |
|------------------|-----------------|-----------------|-----------------|-----------------|
| <b>ScdA-DUF</b>  | 52% (80%)       | 53% (80%)       | 52% (80%)       | 54% (81%)       |
| <b>ScdMT-DUF</b> | 55% (82%)       | 55% (81%)       | 53% (81%)       | 54% (81%)       |
